# Supplementary material
Source: Springer Nature journal article supplement (https://www.springermedizin.de/resource/supplementary/12885_2010_2587_MOESM2_ESM.pdf/9462624)
Supplement: MOESM2 [file 9462624]

# A

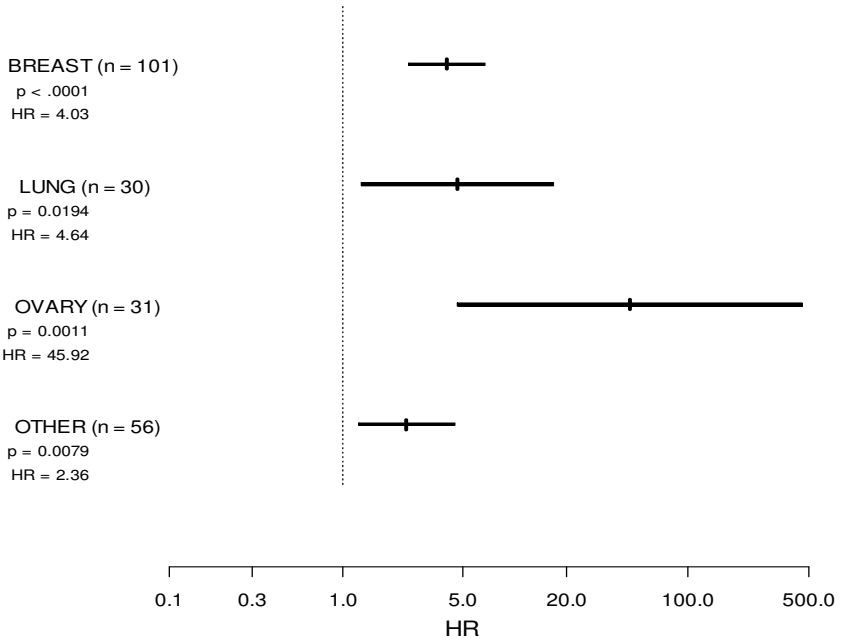

# B

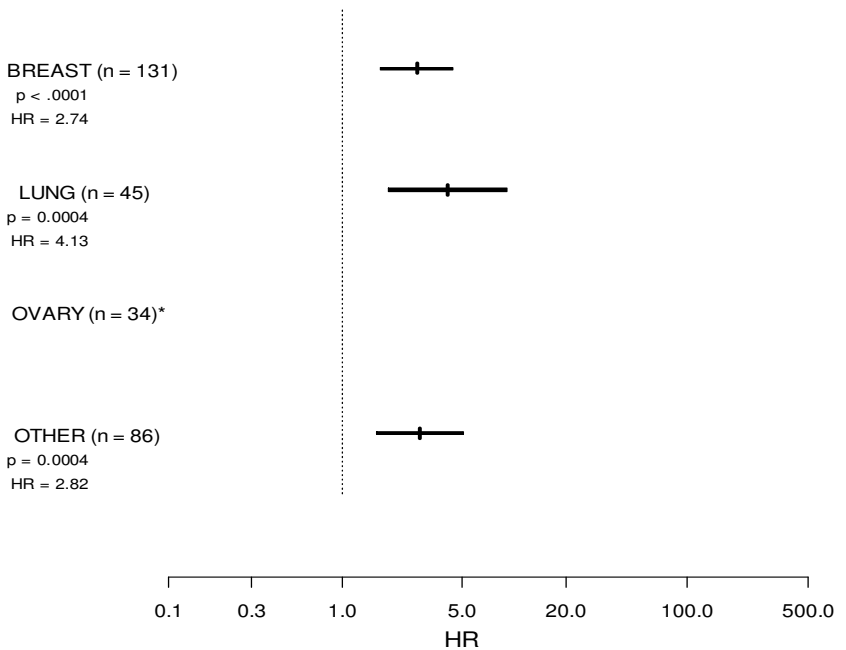

\* No graphic representation for ovary patients because only one patient is considered at risk with score A
